# Supplementary material for: Beliefs About Help Seeking for Mental Disorders: Findings From a Mental Health Literacy Study in Singapore
Source: Atypon-hosted journal article supplement (doi:10.1176/appi.ps.201500442), 2016-08-15
Supplement: appi.ps.201500442.ds001.pdf [file appi.ps.201500442.ds001.pdf]

## Socio-demographic characteristics of the study sample

|                                        | n    | Weighted % | SE  |
|----------------------------------------|------|------------|-----|
| <b>Age group</b>                       |      |            |     |
| 18 to 34 years                         | 1152 | 34.4       | .04 |
| 35 to 49 years                         | 896  | 35.2       | .04 |
| 50 to 65 years                         | 958  | 30.5       | 0.1 |
| <b>Gender</b>                          |      |            |     |
| Female                                 | 1506 | 49.1       | 1.3 |
| Male                                   | 1500 | 50.9       | 1.3 |
| <b>Ethnicity</b>                       |      |            |     |
| Chinese                                | 1034 | 74.7       | .04 |
| Indian                                 | 963  | 9.1        | .01 |
| Malay                                  | 977  | 12.8       | .01 |
| Others                                 | 32   | 3.3        | .04 |
| <b>Marital status</b>                  |      |            |     |
| Married                                | 1916 | 64.0       | 1.0 |
| Never married                          | 927  | 31.4       | .9  |
| Others (Divorced, Widowed, Separated)  | 162  | 4.6        | .5  |
| <b>Education</b>                       |      |            |     |
| 6 years of education and below         | 431  | 13.4       | .8  |
| Secondary education include O/N level  | 820  | 25.8       | 1.0 |
| A level, polytechnic and other diploma | 999  | 31.3       | 1.1 |
| University                             | 756  | 29.6       | 1.1 |
| <b>Employment status</b>               |      |            |     |
| Employed                               | 2227 | 77.6       | 1.0 |
| Housewife                              | 378  | 8.7        | .6  |
| Retired                                | 78   | 3.0        | .4  |
| Student                                | 203  | 6.7        | .5  |
| Unemployed                             | 120  | 3.9        | .5  |
| <b>Monthly income</b>                  |      |            |     |
| SGD2000 (USD1484) and less             | 1346 | 40.5       | 1.2 |
| SGD2000-5999 (USD 1484-4450)           | 1162 | 46.4       | 1.3 |
| SGD6000 (USD4451) and above            | 294  | 13.1       | .9  |
